# Supplementary material
Source: PubMed Central journal article supplement (PMC2932816)

# Supplemental Figure 1

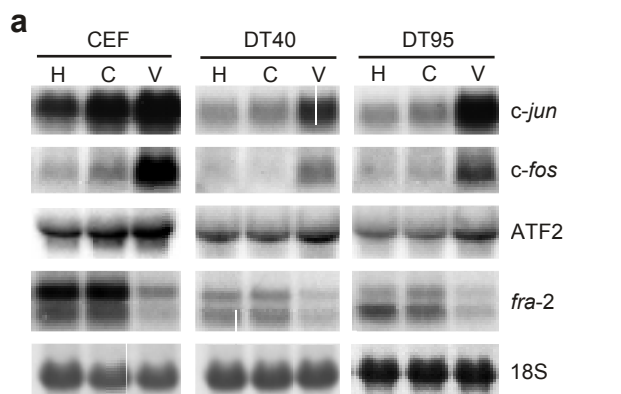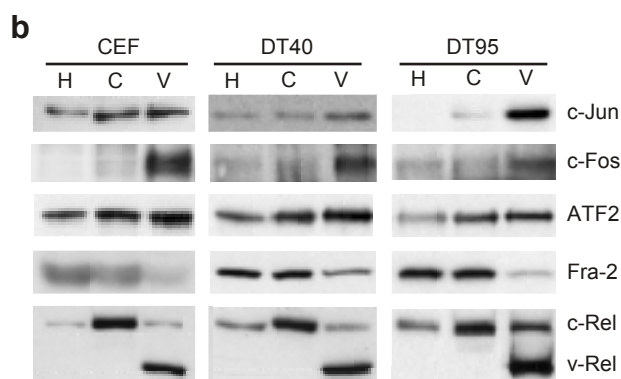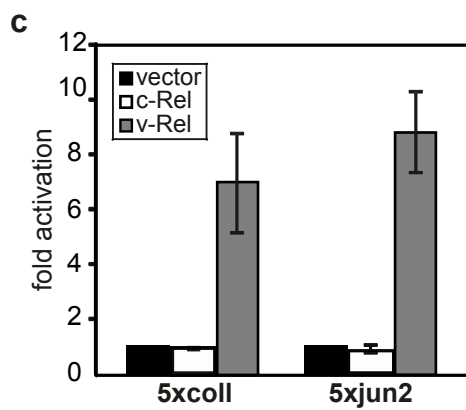

Supplement: NIHMS206663-supplement-1.pdf [file NIHMS206663-supplement-1.pdf]

## Supplemental Figure 2

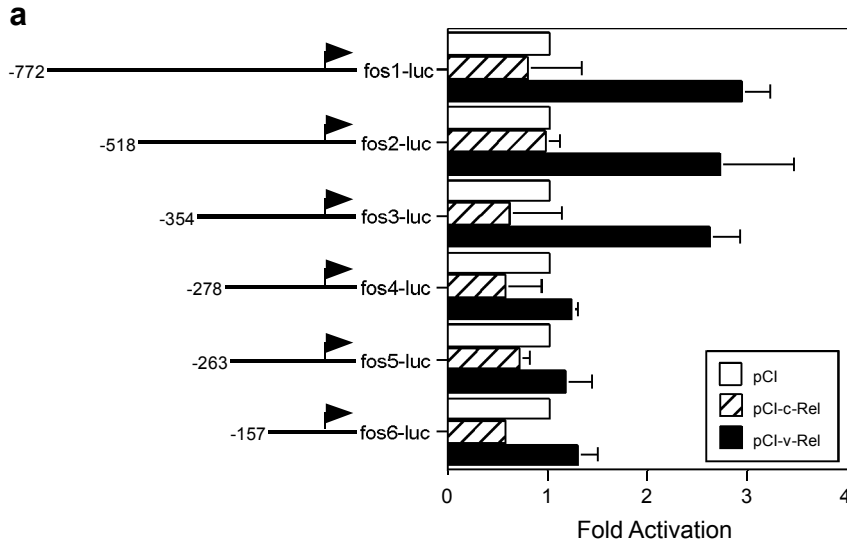

**b**

Elk-1                      SRF                      AP-1                      NF- $\kappa$ B  
 -312 CACAGGATGTATCCATATAAGGATACTCTGCGTCA GTGGGTTCC -267

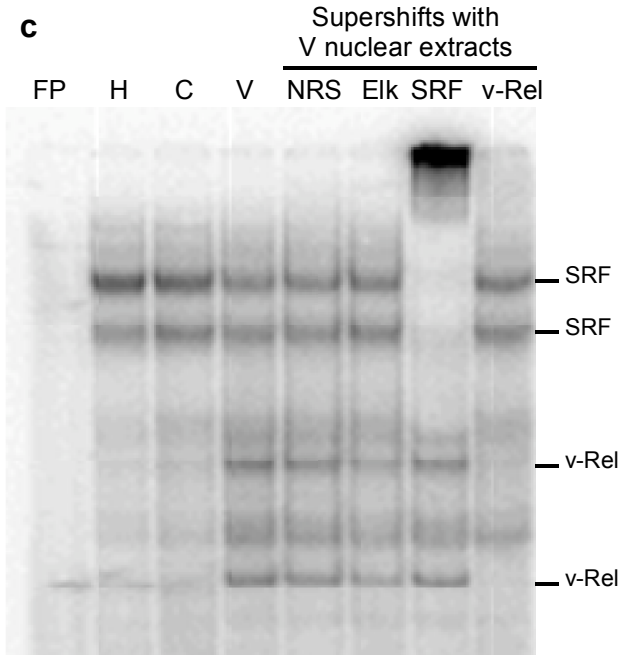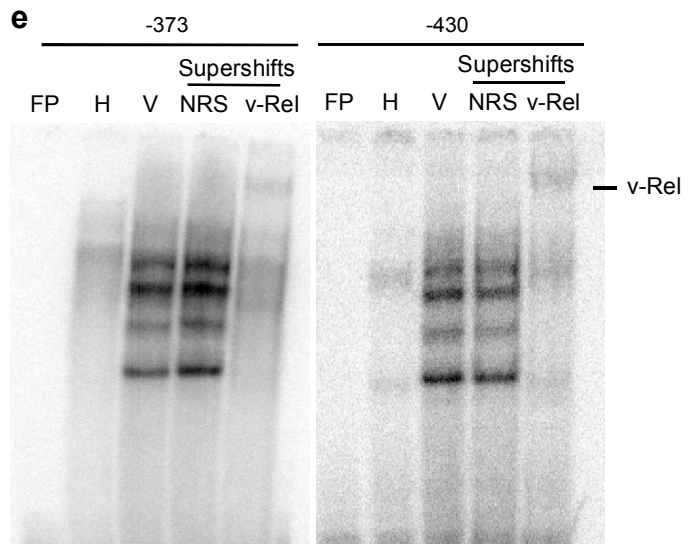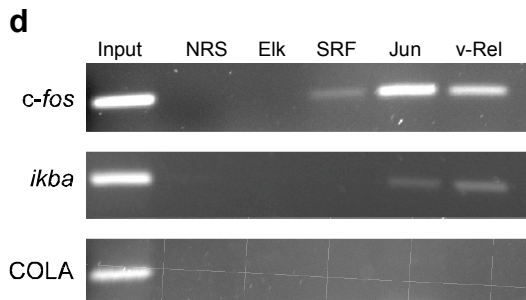

Supplement: NIHMS206663-supplement-2.pdf [file NIHMS206663-supplement-2.pdf]

### Supplemental Figure 3

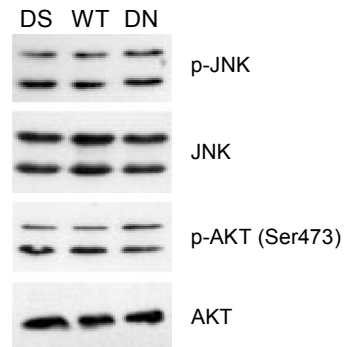

Supplement: NIHMS206663-supplement-3.pdf [file NIHMS206663-supplement-3.pdf]
